# Supplementary material
Source: ML conference proceedings conference paper supplement (https://openreview.net/forum?id=QSUsBMuw0uV)
Supplement: supplementary_material [file attachment]

# Supplementary material: Bayesian Object Models for Robotic Interaction with Differentiable Probabilistic Programming

Anonymous Author(s)

Affiliation

Address

email

1 In this brief document, we provide additional details about our approach.

## 2 1 Differentiable tree sampler

3 First, we prove that our differentiable tree sampler is guaranteed to produce a tree structured random  
4 variable. Recall that the DP-DAG strategy for sampling a DAG represents the graph structured  
5 random variable  $\mathcal{G}$  by its factorized adjacency matrix  $A = PUP^T$ . Here,  $P$  is a permutation matrix  
6 and  $U$  is an upper-triangular matrix. For  $A$  to characterize a tree, we must explicitly forbid any edge  
7 among siblings, or from a descendant to an ancestor in  $U$ .

8 For a proof sketch, recall that in our opportunistic rounding scheme, we disallow all edges  $(k, j)$  (for  
9  $k > i$ ) for all edges  $(i, j)$  in the canonical graph (i.e., with adjacency matrix  $U$ ). By contradiction,  
10 let us assume that an edge  $(k, j)$  is added to the graph while another edge  $(i, j)$  exists. This would  
11 imply that a new path  $i \mapsto k \mapsto j$  is created in the graph. This violates a basic property of a tree;  
12 only a unique path may exist across each pair of nodes (whereas we now have two such paths). This  
13 proves that our sampling strategy is guaranteed to return a tree.

14 *Caveat:* The sampling strategy we present is not an unbiased strategy (the opportunistic rounding  
15 step strongly favours edges between earlier entries in the canonical graph).

## 16 2 Implementation details

17 For model specification and gradient-based probabilistic inference, we leverage the pyro [1] (and  
18 numpyro [2]) probabilistic programming language (PPL). Pyro allows us to specify generative  
19 (probabilistic) models in python code using popular automatic differentiation API (e.g., pytorch [3],  
20 JAX [4]). Additionally, the use of a modern PPL enables us to use the wide variety of (Bayesian) in-  
21 ference engines (including ones that do not leverage autodifferentiation). In our initial experiments,  
22 we found gradient-free inference engines to work only for low-dimensional systems (3-5 param-  
23 eters) and for likelihood functions involving only a small number of timesteps (less than 10). We,  
24 therefore, focus only on the gradient-based inference engines provided by pyro.

### 25 2.1 Inference engines

26 **SVI:** The stochastic variational inference (SVI) solver proceeds by maximizing the evidence lower  
27 bound (ELBO). The *stochasticity* in variational inference arises from the number of samples from  
28 the variational distribution used to compute the likelihood (and by extension the ELBO). In our  
29 experiments, we use 4 samples to compute the expected ELBO.

30 **HMC and NUTS:** For our gradient-based Monte Carlo solvers (Hamiltonian Monte Carlo and No-  
31 U-Turn Sampler), we leverage numpyro for efficient inference. Pyro with a pytorch backend has  
32 been extensively benchmarked against PyMC3 [5] and numpyro [2], and has been found to be sig-  
33 nificantly slower.

### 34 2.2 Prior distributions

35 **Choice of priors for continuous variables:** For the continuous-valued random variables in our  
36 probabilistic model, recall that we use a standard normal distribution as our prior. We also experi-

Submitted to the 6th Conference on Robot Learning (CoRL 2022). Do not distribute.

37 mented with the standard uniform distribution  $\text{Unif}(0, 1)$ , but found marginal gains in inference time  
38 when using Gaussian priors.

39 **Reparameterization trick:** Several physical variables of interest in our model have varying con-  
40 straints on parameter ranges. For instance, elasticity and stiffness parameters are on the scale of  
41  $[1000, 10000]$ , while coefficients of static friction are in the  $[0, 1]$  range. As such both variational  
42 and Monte Carlo inference engines are numerically unstable for such large variations in parameter  
43 ranges. We therefore reparameterize all parameters to a canonical range (-1 through 1).

44 **Computing statistics over reparameterization ranges:** To carry out the above reparameterization,  
45 we use the held out instances (e.g., the *train* split comprising PartNet [6] 3D assets).

46 **Hierarchical priors:** Our framework, optionally, allows for the flexibility of auto-tuning the ob-  
47 servation noise variable if needed. This may be done by introducing a half-normal distribution that  
48 samples the standard-deviation of the observation noise parameter.

49 **References**

- 50 [1] E. Bingham, J. P. Chen, M. Jankowiak, F. Obermeyer, N. Pradhan, T. Karaletsos, R. Singh, P. Szerlip,  
51 P. Horsfall, and N. D. Goodman. Pyro: Deep Universal Probabilistic Programming. *Journal of Machine*  
52 *Learning Research*, 2018.
- 53 [2] D. Phan, N. Pradhan, and M. Jankowiak. Composable effects for flexible and accelerated probabilistic  
54 programming in numpyro. *International Conference on Probabilistic Programming*, 2020.
- 55 [3] A. Paszke, S. Gross, S. Chintala, G. Chanan, E. Yang, Z. DeVito, Z. Lin, A. Desmaison, L. Antiga, and  
56 A. Lerer. Automatic differentiation in pytorch. 2017.
- 57 [4] J. Bradbury, R. Frostig, P. Hawkins, M. J. Johnson, C. Leary, D. Maclaurin, G. Necula, A. Paszke, J. Van-  
58 derPlas, S. Wanderman-Milne, and Q. Zhang. JAX: composable transformations of Python+NumPy pro-  
59 grams, 2018. URL <http://github.com/google/jax>.
- 60 [5] J. Salvatier, T. V. Wiecki, and C. Fonnesbeck. Probabilistic programming in python using pymc3. *PeerJ*  
61 *Computer Science*, 2:e55, 2016.
- 62 [6] K. Mo, S. Zhu, A. X. Chang, L. Yi, S. Tripathi, L. J. Guibas, and H. Su. PartNet: A large-scale benchmark  
63 for fine-grained and hierarchical part-level 3D object understanding. In *CVPR*, 2019.
